# Supplementary material for: High strength hydrogels with multiple shape-memory ability based on hydrophobic and electrostatic interactions
Source: Royal Society of Chemistry journal article supplement (doi:10.1039/c9sm00869a), 2019-01-01
Supplement: c9sm00869a1.pdf [file c9sm00869a1.pdf]

### Supporting information for

## High Strength Hydrogels with Multiple Shape Memory Ability Based on Hydrophobic and Electrostatic Interaction

Houchao Jing<sup>a,b</sup>, Lin He<sup>a</sup>, Jinyang Feng<sup>a</sup>, Hai Fu<sup>a,b</sup>, Shuang Guan<sup>\*a,b</sup> and Peipei Guo<sup>\*a,b</sup>

*a.* School of Chemistry and Life Science, Changchun University of Technology, 2055 Yanan Street, Changchun 130012, PR China.

*b.* Advanced Institute of Materials Science, Changchun University of Technology, 2055 Yanan Street, Changchun 130012, PR China.

### Supporting Figures

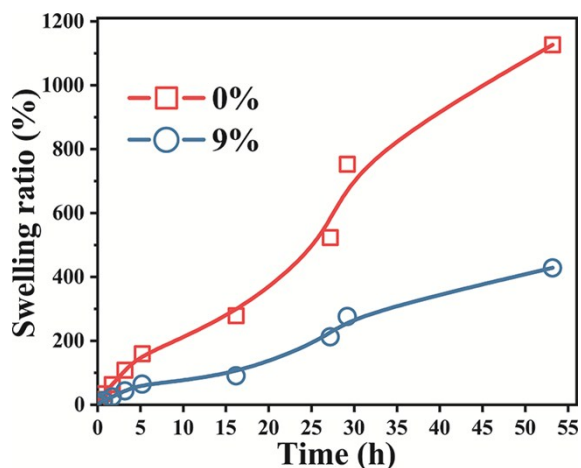

Figure S1. Swelling experiment at 80°C.

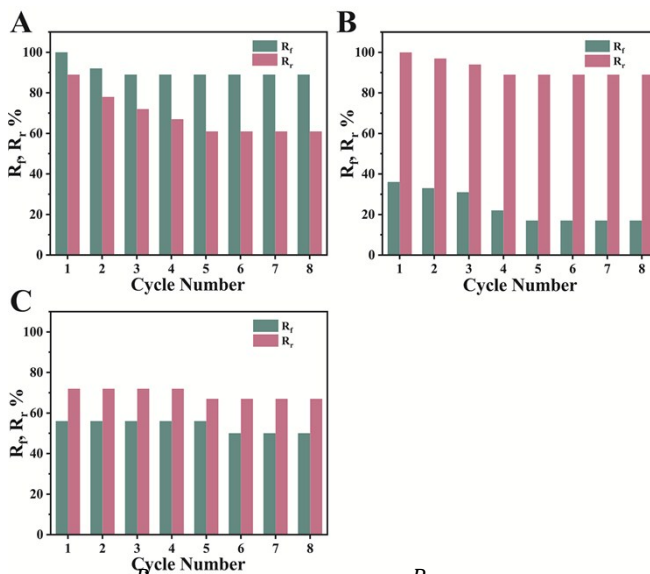

Figure S2. Shape memory fixed ratio ( $R_f$ ) and recovery efficiency ( $R_R$ ) via (A) thermal-stimuli shape-memory, (B) pH-stimuli shape-memory and (C) saline-stimuli shape-memory during eight consecutive cycle.
